# Supplementary material for: A new class of spirocyclic photochromes reacting with light of both UV and visible ranges
Source: Royal Society of Chemistry journal article supplement (doi:10.1039/c6nj00666c), 2016-01-01
Supplement: c6nj00666c1.pdf [file c6nj00666c1.pdf]

## Electronic Supplementary Information

### A New Type of Spirocyclic Photochromes Reacting with Light of both UV and Visible Ranges

Laura Bekere,<sup>a</sup> Nina Larina,<sup>a</sup> Vladimir Lokshin,<sup>a</sup> A. Ellern<sup>b</sup>, Mark Sigalov,<sup>c</sup>  
Vladimir Khodorkovsky<sup>a\*</sup>

<sup>a</sup> Aix Marseille Université, CNRS, CINaM UMR 7325, 13288, Marseille, France.

<sup>b</sup> Chemistry Department, Iowa State University, 1711 Gilman Hall, Ames, IA, 50011, USA

<sup>c</sup> Department of Chemistry, Ben Gurion University of the Negev, 84105, Beer Sheva, Israel

#### Table of Content

|                                                              |   |
|--------------------------------------------------------------|---|
| 1. General                                                   | 1 |
| 2. Synthesis                                                 | 2 |
| 3. <sup>1</sup> H NMR Spectra (Figs. 1S – 5S)                | 4 |
| 4. Short intermolecular distances H...O and C...O (Table 1S) | 6 |
| 5. Quantum mechanical calculations (Table 2S)                | 7 |

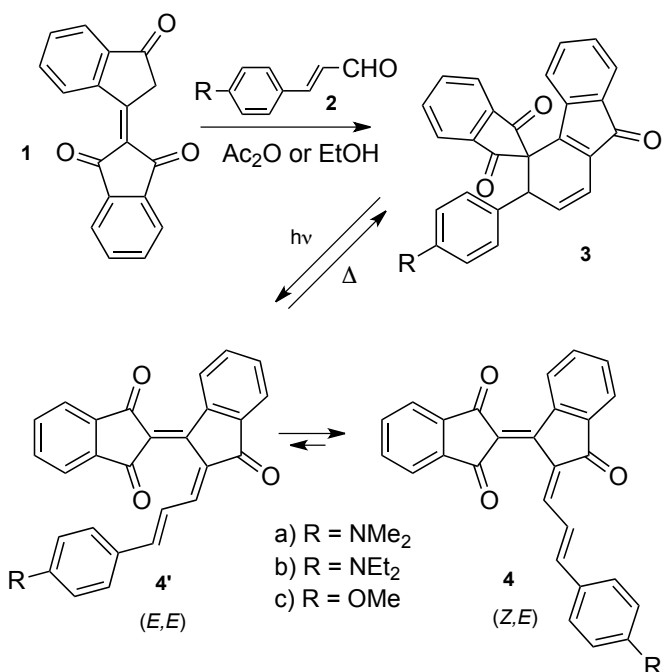

#### 1. General

Bindone, cinnamic aldehyde derivatives and solvents were obtained from Sigma-Aldrich and Alfa-Aeser. Acetic anhydride was freshly distilled.

<sup>1</sup>H spectra were recorded on Bruker AMX spectrometer at 500.13 and 125.77 MHz, respectively; and JEOL ECS400 at 399.78. Proton chemical shifts are given in ppm downfield from tetramethylsilane and coupling constants (*J*) in Hertz. Melting points were determined on a Büchi-510 apparatus and were not corrected.

X-ray crystallography data were collected on a Bruker-Nonius KappaCCD diffractometer with CCD detector using MoK<sub>α</sub> radiation,  $\lambda = 0.71073 \text{ \AA}$ . The CIF files have been deposited at the Cambridge Crystallographic Data Centre: **3a**: CCDC 1436240, **3b**: CCDC 1436241 and **3c**: CCDC 1436242.

The UV-Vis absorption were recorded with Ocean Optics USB 4000 and JASCO V-660 in 4, 10 and 100 mm quartz cells.

Irradiation of solutions was done using a UVP LLC 95000505 lamp (254 nm), LED sources LUMOS 43 (Atlas Photonics) at 300, 315, 330, 350, 405, 450, 505 and 525 nm and lasers: Module Oxixus LBX-405-500-HPE-PP 405 nm, LBX-642-130-CIR-PP 642 nm, CryLas FQSS 266-200 (266 and 532 nm) and FQSS 355-300 (355 nm).

## 2. Synthesis

- a) A mixture of bindone **1** (1 mmol) and the corresponding cinnamaldehyde (1.2 mmol) was dissolved in freshly distilled acetic anhydride (2 ml) and heated under reflux for 0.5 – 1.5 h. The formed products **3** were filtered off, washed with MeCN and dried on air and crystallized from MeCN or toluene. Derivatives **3a-c** do not exhibit characteristic melting points and slowly darken owing to the formation of **4** and finally melt leaving deeply colored spots. The initial reddish crystals of **3a-c** are formed upon cooling.
- b) A mixture of bindone **1** (1 mmol) and the corresponding cinnamaldehyde (1.2 mmol) was refluxed in absolute ethanol for 2 -3 hours. The precipitated product was washed with ethanol, dried on air and crystallized.

### 3-(4-(Dimethylamino)phenyl)spiro[fluorene-4,2'-[2H]indene]-1',3',9(3H)-trione **3a**

Yield: 63 % (method a), 71 % (method b) of reddish crystals, turn deep green above 200°C and revert to red upon cooling. Decomposes upon heating above 220°C.

<sup>1</sup>H NMR (CD<sub>2</sub>Cl<sub>2</sub>): 2.77 (6H, t, *J*=7.0 Hz, CH<sub>3</sub>); 4.63 (1H, dd, *J*<sub>1</sub>=3.4, *J*<sub>2</sub>=3.0, CH); 6.06 (1H, dd, *J*<sub>1</sub>=9.7, *J*<sub>2</sub>=3.0, CH); 6.19 (1H, td, *J*<sub>1</sub>=7.3, *J*<sub>2</sub>=0.71, CH); 6.38 (2H, d, *J*=8.9, CH); 6.53 (1H, dd, *J*<sub>1</sub>=9.7, *J*<sub>2</sub>=3.4, CH); 6.84 (2H, d, *J*=8.9, CH); 7.03 (1H, ddd, *J*<sub>1</sub>=7.55, *J*<sub>2</sub>=1.2, CH); 7.11 (1H, ddd, *J*<sub>1</sub>=7.4, *J*<sub>2</sub>=0.8, CH); 7.39 (1H, ddd, *J*<sub>1</sub>=7.1, *J*<sub>2</sub>=1.0, CH); 7.74 (1H, ddd, *J*<sub>1</sub>=7.6, *J*<sub>2</sub>=1.0, CH); 7.80 (1H, ddd, *J*<sub>1</sub>=7.4, *J*<sub>2</sub>=1.2, *J*<sub>3</sub>=0.8, CH); 7.97 (1H, ddd, *J*<sub>1</sub>=7.6, *J*<sub>2</sub>=1.0, *J*<sub>3</sub>=0.8, CH).

Calculated: C 80.72, H 4.91, N 3.25; C<sub>29</sub>H<sub>21</sub>NO<sub>3</sub>; found: C 80.81, H 4.95, N 3.18.

***trans*-3-(4-(Dimethylamino)phenyl)allylidene)-[1,2'-biindenylidene]-1',3,3'(2*H*)-trione 4a**

<sup>1</sup>H NMR (CD<sub>2</sub>Cl<sub>2</sub>): 3.11 (6H, s, CH<sub>3</sub>); 6.69 (2H, d, *J*=8.7, CH); 7.33 (1H, d, *J*=14.9, CH); 7.51 (1H, m, CH); 7.56 (1H, m, CH); 7.59 (2H, ddd, *J*<sub>1</sub>=7.3, *J*<sub>2</sub>=1.0, CH); 7.62 (2H, d, *J*=8.5, CH); 7.81 (1H, d, *J*=7.8, CH); 7.91 (2H, m, CH); 8.18 (1H, d, *J*=12.1, CH); 8.67 (1H, dd, *J*<sub>1</sub>=14.9, *J*<sub>2</sub>=12.1, CH); 8.88 (1H, d, *J*=8.0, CH).

**3-(4-(Diethylamino)phenyl)spiro[fluorene-4,2'-[2*H*]indene]-1',3',9(3*H*)-trione 3b**

Yield: 42 % (a), 68% (b) of reddish crystals, turn deep green above 120°C.

<sup>1</sup>H NMR (CD<sub>2</sub>Cl<sub>2</sub>): 0.96 (6H, t, *J*=7.0, CH<sub>3</sub>); 3.16 (4H, q, *J*=7.0, CH<sub>2</sub>); 4.60 (1H, dd, *J*<sub>1</sub>=3.4, *J*<sub>2</sub>=3.0, CH); 6.07 (1H, dd, *J*<sub>1</sub>=9.7, *J*<sub>2</sub>=3.0, CH); 6.21 (1H, d, *J*<sub>1</sub>=7.3, CH); 6.31 (2H, d, *J*=8.8, CH); 6.53 (1H, dd, *J*<sub>1</sub>=9.7, *J*<sub>2</sub>=3.4, CH); 6.79 (2H, d, *J*=8.8, CH); 7.04 (1H, ddd, *J*<sub>1</sub>=7.6, *J*<sub>2</sub>=1.2, CH); 7.11 (1H, ddd, *J*<sub>1</sub>=7.10, *J*<sub>2</sub>=0.7, CH); 7.39 (1H, ddd, *J*<sub>1</sub>=7.1, *J*<sub>2</sub>=0.6, CH); 7.66 (1H, m, CH); 7.71 (1H, ddd, *J*<sub>1</sub>=7.6, *J*<sub>2</sub>=7.2 and *J*<sub>3</sub>=1.2, CH); 7.77 (1H, ddd, *J*<sub>1</sub>=7.4, *J*<sub>2</sub>=1.3, CH); 7.95 (1H, td, *J*<sub>1</sub>=7.6, *J*<sub>2</sub>=1.3, CH).

Calculated: C 81.02, H 5.48, N 3.05; C<sub>31</sub>H<sub>25</sub>NO<sub>3</sub>; found: C 81.12, H 5.55, N 3.11.

**3-(4-Methoxyphenyl)spiro[fluorene-4,2'-[2*H*]indene]-1',3',9(3*H*)-trione 3c**

Yield: 75 % (a) of yellow-orange crystals, turn deep violet above 140°C.

<sup>1</sup>H NMR (CD<sub>2</sub>Cl<sub>2</sub>): 3.61 (3H, s, OCH<sub>3</sub>); 4.69 (1H, dd, *J*<sub>1</sub>=3.4, *J*<sub>2</sub>=2.9, CH); 6.06 (1H, dd, *J*<sub>1</sub>=9.7, *J*<sub>2</sub>=2.9, CH); 6.19 (1H, d, *J*=7.2, CH); 6.56 (1H, dd, *J*<sub>1</sub>=9.7, *J*<sub>2</sub>=3.4, CH); 6.57 (2H, d, *J*=8.82, CH); 6.93 (2H, d, *J*=8.6, CH); 7.04 (1H, dd, *J*<sub>1</sub>=7.5, *J*<sub>2</sub>=1.2, CH); 7.12 (1H, dd, *J*<sub>1</sub>=7.4, *J*<sub>2</sub>=0.9, CH); 7.40 (1H, ddd, *J*<sub>1</sub>=7.1, *J*<sub>2</sub>=1.2, *J*<sub>3</sub>=0.9, CH); 7.68 (2H, m, CH); 7.74 (1H, dd, *J*<sub>1</sub>=7.2, *J*<sub>2</sub>=1.3, CH); 7.78 (1H, dd, *J*<sub>1</sub>=7.3, *J*<sub>2</sub>=1.3, CH).

Calculated: C 80.37, H 4.34; C<sub>28</sub>H<sub>18</sub>O<sub>4</sub>; found: C 80.44, H 4.30

***trans*-3-(4-Methoxyphenyl)allylidene)-[1,2'-biindenylidene]-1',3,3'(2*H*)-trione 4c** (generated by irradiation of the solution in CD<sub>2</sub>Cl<sub>2</sub> at 532 nm).

<sup>1</sup>H NMR (CD<sub>2</sub>Cl<sub>2</sub>): 3.88 (3H, s, OCH<sub>3</sub>); 6.97 (2H, d, *J*=8.8, CH); 7.30 (1H, d, *J*=15.1, CH); 7.68 (4H, m, CH); 7.81 (2H, m, CH); 7.86 (1H, td, *J*<sub>1</sub>=7.3, *J*<sub>2</sub>=0.8, CH); 7.96 (1H, td, *J*<sub>1</sub>=7.7, *J*<sub>2</sub>=1.3, *J*<sub>3</sub>=0.8, CH); 8.13 (1H, d, *J*=11.9, CH); 8.69 (1H, dd, *J*<sub>1</sub>=15.1, *J*<sub>2</sub>=11.9, CH); 9.05 (1H, d, *J*=7.7, CH).

3.  $^1\text{H}$  NMR Spectra

4 Aug 2015

|                        |                                                                                                                    |                        |                      |
|------------------------|--------------------------------------------------------------------------------------------------------------------|------------------------|----------------------|
| Acquisition Time (sec) | 6.6191                                                                                                             | Date                   | 12 May 2014 14:38:56 |
| File Name              | Y:\mware-host\Shared Folders\Documents\Biodon\Mark\NMR\spectra\VKh_dMe_photochrome\VKh_dMe_photochrome_0010001.fid |                        |                      |
| Frequency (MHz)        | 500.13                                                                                                             | Nucleus                | $^1\text{H}$         |
| Points Count           | 65536                                                                                                              | Pulse Sequence         | zg                   |
| Sweep Width (Hz)       | 4950.50                                                                                                            | Temperature (degree C) | 23.500               |
|                        |                                                                                                                    | Solvent                | DICHLOROMETHANE-D2   |
|                        |                                                                                                                    | Number of Transients   | 45                   |
|                        |                                                                                                                    | Original Points Count  | 32768                |

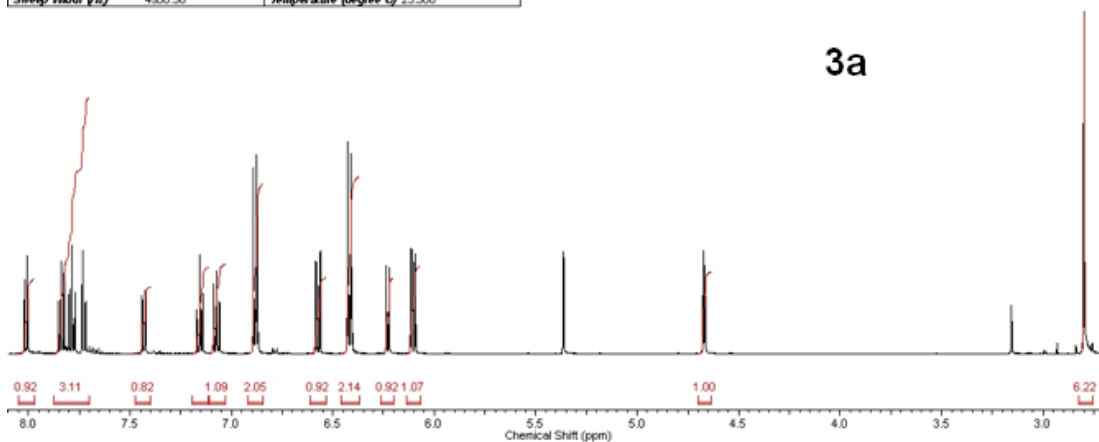

4 Aug 2015

|                        |                                                                                                                    |                        |                      |
|------------------------|--------------------------------------------------------------------------------------------------------------------|------------------------|----------------------|
| Acquisition Time (sec) | 6.6191                                                                                                             | Date                   | 12 May 2014 14:38:56 |
| File Name              | Y:\mware-host\Shared Folders\Documents\Biodon\Mark\NMR\spectra\VKh_dMe_photochrome\VKh_dMe_photochrome_0010001.fid |                        |                      |
| Frequency (MHz)        | 500.13                                                                                                             | Nucleus                | $^1\text{H}$         |
| Points Count           | 65536                                                                                                              | Pulse Sequence         | zg                   |
| Sweep Width (Hz)       | 4950.50                                                                                                            | Temperature (degree C) | 23.500               |
|                        |                                                                                                                    | Solvent                | DICHLOROMETHANE-D2   |
|                        |                                                                                                                    | Number of Transients   | 45                   |
|                        |                                                                                                                    | Original Points Count  | 32768                |

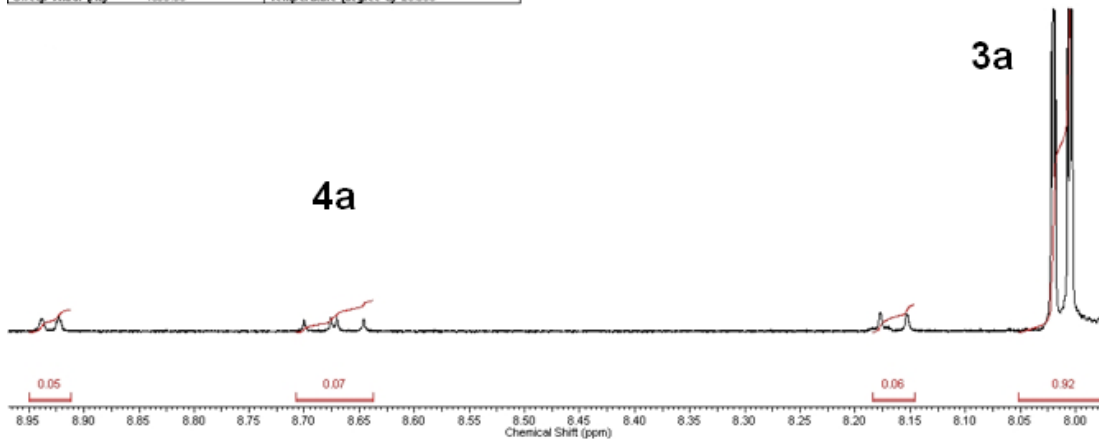Figure 1S.  $^1\text{H}$ -NMR spectra (low field region) of **3a** and **4a** in  $\text{CD}_2\text{Cl}_2$ .

|                        |                                                                                                |                        |                      |
|------------------------|------------------------------------------------------------------------------------------------|------------------------|----------------------|
| Acquisition Time (sec) | 6.6191                                                                                         | Date                   | 25 May 2014 14:34:40 |
| File Name              | Y:\mware-host\Shared Folders\Documents\Biodon\Mark\NMR\toluene\4d-Me_toluene\4d-Me_toluene.fid |                        |                      |
| Nucleus                | $^1\text{H}$                                                                                   | Number of Transients   | 68                   |
| Pulse Sequence         | zg                                                                                             | Solvent                | Tol                  |
|                        |                                                                                                | Sweep Width (Hz)       | 4950.50              |
|                        |                                                                                                | Temperature (degree C) | 23.000               |
|                        |                                                                                                | Frequency (MHz)        | 500.13               |
|                        |                                                                                                | Points Count           | 65536                |

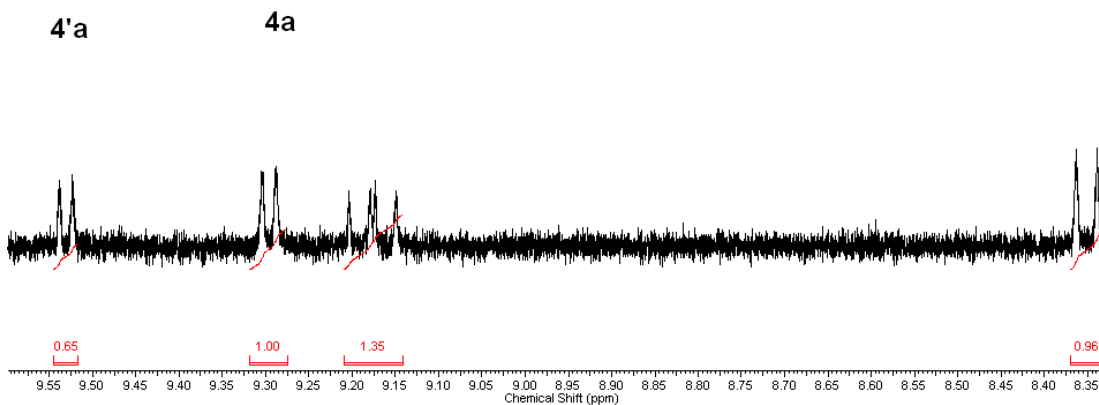

**Figure 2S.**  $^1\text{H-NMR}$  spectra (low field region) of **4a** and **4'a** in  $\text{toluene-d}_8$

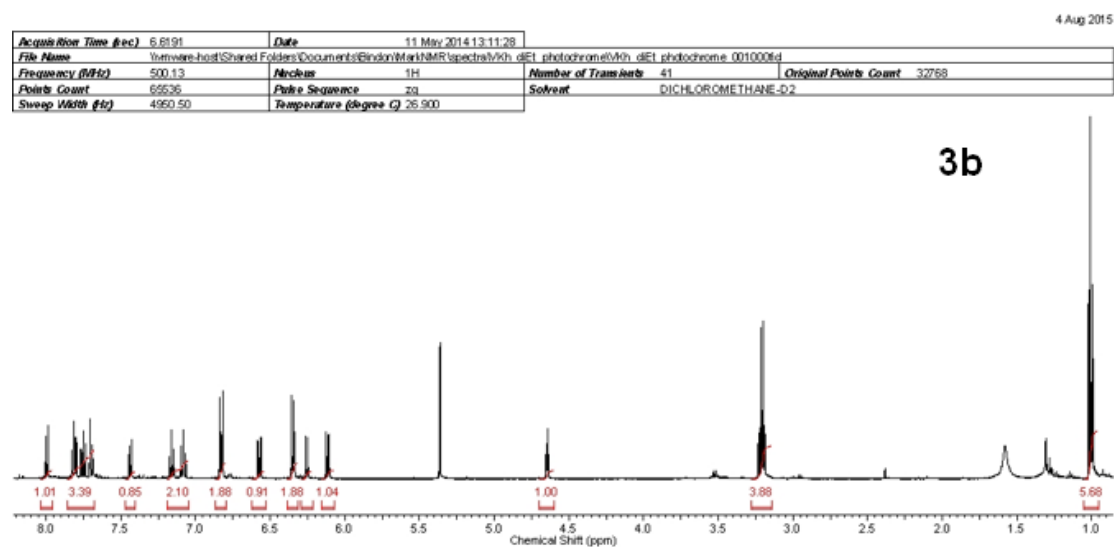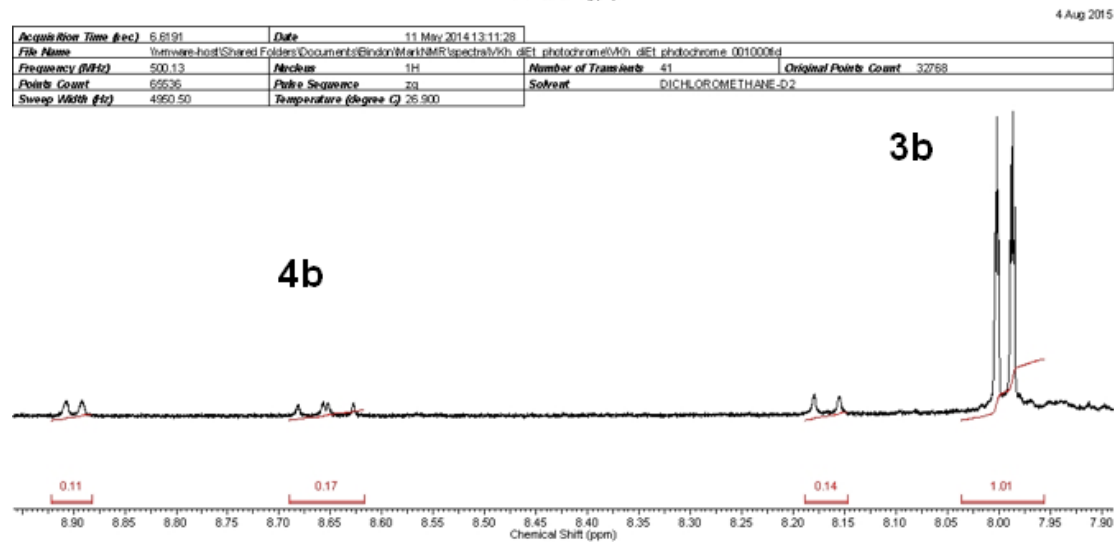

**Figure 3S.**  $^1\text{H-NMR}$  spectra (low field region) of **3b** and **4b** in  $\text{CD}_2\text{Cl}_2$ .

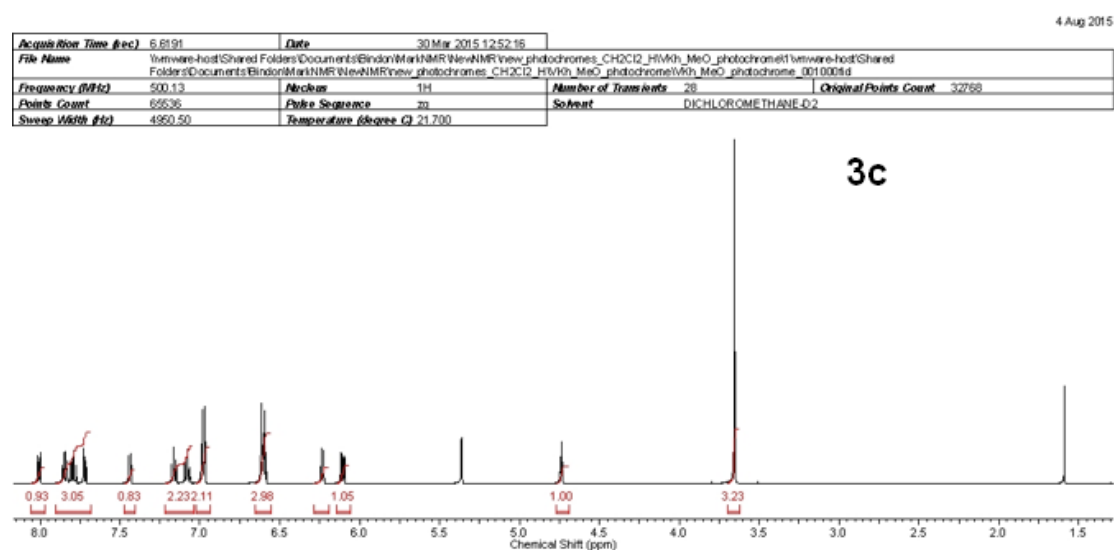

**Figure 4S.**  $^1\text{H-NMR}$  spectra of **3c** in  $\text{CD}_2\text{Cl}_2$ .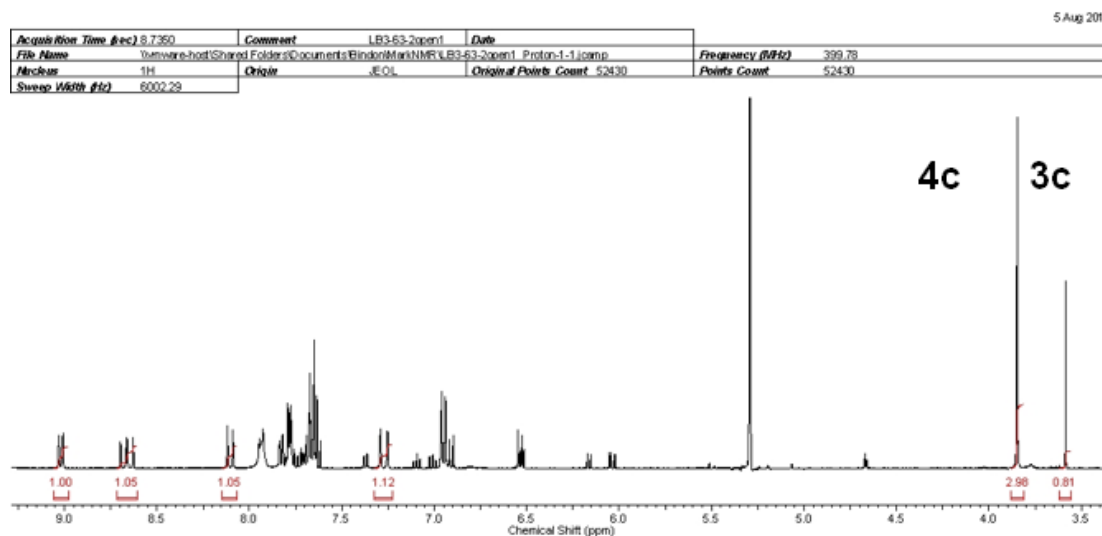**Figure 5S.**  $^1\text{H-NMR}$  spectra of **3c** in  $\text{CD}_2\text{Cl}_2$  after irradiation at 505 nm. Major signals correspond to **4c**.

#### 4. Short intermolecular distances H...O and C...O.

Table 1S. Short intermolecular distances H...O and C...O and angles C-H...O in **3a**, **3b** and **3c**.

|           | $d_{\text{H}\dots\text{O}}(\text{\AA})$ | $d_{\text{C}\dots\text{O}}(\text{\AA})$ | $\angle_{\text{C-H}\dots\text{O}}(^{\circ})$ |                        |                   |
|-----------|-----------------------------------------|-----------------------------------------|----------------------------------------------|------------------------|-------------------|
| <b>3a</b> | 2.68                                    | 3.231(11)                               | 117.4                                        | O2....C3               | [0.5-x, y, z-0.5] |
|           | 2.65                                    | 3.216(11)                               | 118.7                                        | O2....C3               | [0.5-x, y, z-0.5] |
|           | 2.66                                    | 3.592(10)                               | 168.2                                        | O1....C9               | [1-x, 1-y, 0.5+z] |
|           | 2.60                                    | 3.452(10)                               | 149.1                                        | O1....C16              | [1-x, -y, 0.5+z]  |
|           | 2.61                                    | 3.247(11)                               | 124.9                                        | O2....C19              | [1-x, -y, z-0.5]  |
|           | 2.58                                    | 3.305(10)                               | 133.7                                        | O3.....C23             | [x-0.5, 1-y, z]   |
|           | 2.63                                    | 3.137(12)                               | 112.1                                        | O3.....C28             | [1-x, 1-y, 0.5+z] |
|           | <b>3b</b>                               | 2.81                                    | 3.693(4)                                     | 158.8                  | C7-H7...O3_\$1    |
| 2.42      |                                         | 3.183(4)                                | 138.9                                        | C16-H16...O2_\$2       |                   |
| 2.76      |                                         | 3.568(4)                                | 145.8                                        | C26-H26...O1_\$3       |                   |
| 2.82      |                                         | 3.638(10)                               | 143.1                                        | C31A_a-H31B_a...O3_\$5 |                   |
| 3.07      |                                         | 3.690(15)                               | 123.8                                        | C31B_b-H31E_b...O2_\$6 |                   |
| <b>3c</b> | 2.64                                    | 3.227(2)                                | 120.4                                        | C4-H4...O8_\$1         |                   |
|           | 2.73                                    | 3.282(2)                                | 117.9                                        | C5-H5...O8_\$1         |                   |
|           | 2.67                                    | 3.5098(19)                              | 147.7                                        | C7-H7...O1_\$2         |                   |
|           | 2.60                                    | 3.2715(16)                              | 127.7                                        | C11-H11...O6_\$3       |                   |
|           | 2.79                                    | 3.3755(16)                              | 120.7                                        | C12-H12...O6_\$3       |                   |
|           | 2.42                                    | 3.2107(18)                              | 140.8                                        | C17-H17...O3_\$1       |                   |
|           | 2.95                                    | 3.802(2)                                | 150.4                                        | C24-H24...O5           |                   |
|           | 2.56                                    | 3.2263(19)                              | 127.2                                        | C32-H32...O4_\$4       |                   |
|           | 2.81                                    | 3.361(2)                                | 117.5                                        | C33-H33...O4_\$4       |                   |

|      |            |       |                   |
|------|------------|-------|-------------------|
| 2.83 | 3.384(2)   | 118.4 | C34-H34...06_\$5  |
| 2.75 | 3.3402(17) | 120.9 | C35-H35...06_\$5  |
| 2.54 | 3.2614(18) | 133.1 | C39-H39...01_\$6  |
| 2.46 | 3.1953(18) | 133.6 | C45-H45...07_\$4  |
| 2.87 | 3.6223(19) | 136.5 | C52-H52...02_\$6  |
| 2.86 | 3.519(3)   | 125.4 | C56-H56B...04_\$7 |

## 6. Quantum Mechanical Calculations.

### Reference:

Gaussian 09, Revision A.02, M. J. Frisch, G. W. Trucks, H. B. Schlegel, G. E. Scuseria, M. A. Robb, J. R. Cheeseman, G. Scalmani, V. Barone, B. Mennucci, G. A. Petersson, H. Nakatsuji, M. Caricato, X. Li, H. P. Hratchian, A. F. Izmaylov, J. Bloino, G. Zheng, J. L. Sonnenberg, M. Hada, M. Ehara, K. Toyota, R. Fukuda, J. Hasegawa, M. Ishida, T. Nakajima, Y. Honda, O. Kitao, H. Nakai, T. Vreven, J. A. Montgomery, Jr., J. E. Peralta, F. Ogliaro, M. Bearpark, J. J. Heyd, E. Brothers, K. N. Kudin, V. N. Staroverov, R. Kobayashi, J. Normand, K. Raghavachari, A. Rendell, J. C. Burant, S. S. Iyengar, J. Tomasi, M. Cossi, N. Rega, J. M. Millam, M. Klene, J. E. Knox, J. B. Cross, V. Bakken, C. Adamo, J. Jaramillo, R. Gomperts, R. E. Stratmann, O. Yazyev, A. J. Austin, R. Cammi, C. Pomelli, J. W. Ochterski, R. L. Martin, K. Morokuma, V. G. Zakrzewski, G. A. Voth, P. Salvador, J. J. Dannenberg, S. Dapprich, A. D. Daniels, O. Farkas, J. B. Foresman, J. V. Ortiz, J. Cioslowski, and D. J. Fox, Gaussian, Inc., Wallingford CT, 2009.

**3a** td=(nstates=12) b3lyp/6-31g(d,p)

Excited State 1: Singlet-A 2.1326 eV 581.37 nm f=0.0091 <S\*\*2>=0.000  
 112 ->114 0.25156  
 113 ->114 0.64855  
 113 ->115 0.10470

**3a** td=(nstates=10) b3lyp/6-31g(d,p) scrf=(solvent=dichloromethane)

Excited State 1: Singlet-A 1.9386 eV 639.55 nm f=0.0037 <S\*\*2>=0.000  
 112 ->114 0.12109  
 113 ->114 0.68803

**4a** td=(nstates=12) b3lyp/6-31g(d,p)

Excited State 1: Singlet-A 2.2573 eV 549.25 nm f=0.6800 <S\*\*2>=0.000  
 112 ->114 -0.12021  
 113 ->114 0.66755  
 113 ->115 0.15565

**Table 2S.** Energy differences (ZPE corrected) between **3** and **4**, (in kcal/mol)<sup>a</sup>

|                                     | $\Delta E$ | $\Delta H^\circ$ | $\Delta G^\circ$ |
|-------------------------------------|------------|------------------|------------------|
| <b>a</b> ( <i>ZE</i> )              | 10.35      | 9.79             | 12.93            |
| <b>a</b> ( <i>EE</i> )              | 7.00       | 6.46             | 8.97             |
| <b>a</b> ( <i>ZZ</i> )              | 4.71       | 4.20             | 6.78             |
| <b>a</b> ( <i>EZ</i> )              | 3.34       | 2.89             | 5.08             |
| <b>a</b> <sup>b</sup> ( <i>ZE</i> ) | 11.30      | 10.79            | 13.11            |
| <b>a</b> <sup>c</sup> ( <i>ZE</i> ) | 10.17      | -                | -                |
| <b>c</b>                            | 8.60       | 8.03             | 10.35            |
| <b>c</b> <sup>b</sup>               | 8.41       | -                | -                |

<sup>a</sup> B3LYP/6-31G(d,p)//B3LYP/6-31G(d,p). <sup>b</sup> in CH<sub>2</sub>Cl<sub>2</sub>. <sup>c</sup> B3LYP/6-311+G(2d,p)//B3LYP/6-31G(d,p).
